# Supplementary material for: Fabrication of low-cost and flexible perovskite solar cells by slot-die coating for indoor applications
Source: Royal Society of Chemistry journal article supplement (doi:10.1039/d3ma00285c), 2023-01-01
Supplement: d3ma00285c1.pdf [file d3ma00285c1.pdf]

MATERIALS ADVANCES 2023

## Supplementary Information

### **Fabrication of low-cost and flexible Perovskite Solar Cells by slot-die coating for indoor applications**

*Cristina Teixeira,<sup>1,2,3</sup> Rosinda Fuentes-Pineda,<sup>1</sup> Luísa Andrade,<sup>2,3</sup> Adélio Mendes,<sup>2,3</sup> and Dávid*

*Forgács<sup>1\*</sup>*

1 - Saule Technologies, Wrocław Technology Park, 11 Dúnska Str., Sigma building, Wrocław, PL 54-427, Poland

2 - LEPABE - Laboratory for Process Engineering, Environment, Biotechnology and Energy, Faculty of Engineering, University of Porto, Rua Dr. Roberto Frias, 4200-465 Porto, Portugal

3 - ALiCE - Associate Laboratory in Chemical Engineering, Faculty of Engineering, University of Porto; Rua Dr. Roberto Frias, PT 4200-465 Porto, Portugal

\*e-mail: david.forgacs@sauletech.com

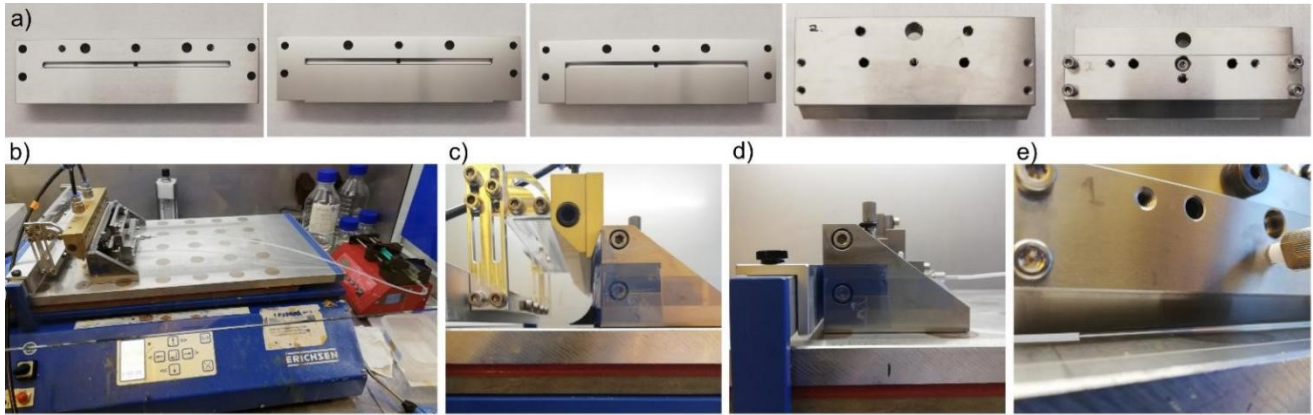

**Figure S1.** a,e) Shims assembly for the 3D perovskite layer; b) film applicator with air-knife and slot-die coater assembled; slot-die head and attachment part c) for the 3D perovskite and d) for the SnO<sub>2</sub> deposition.

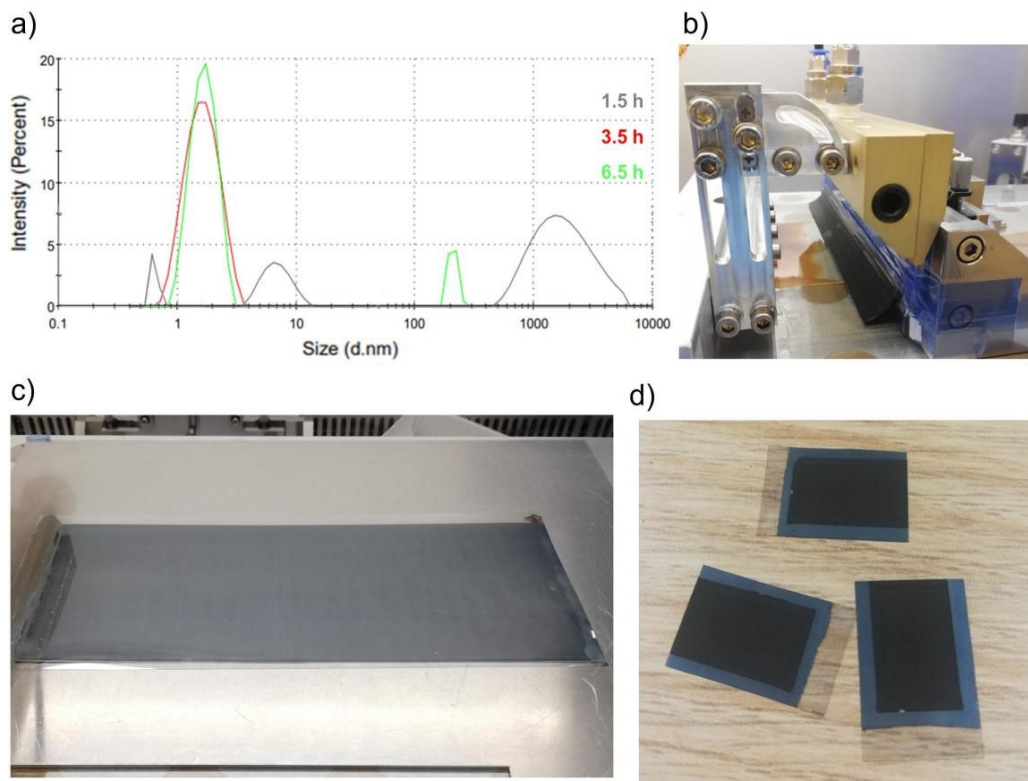

**Figure S2.** a) Particle size distribution of 3D perovskite solution for different stirring times; b) perovskite's intermediate phase after parallel N<sub>2</sub> flow exposure during slot-die coating; c) slot-die coated 3D perovskite film after annealing: 10 cm x 20 cm; d) complete perovskite solar cells of 1.8 cm x 1.2 cm.

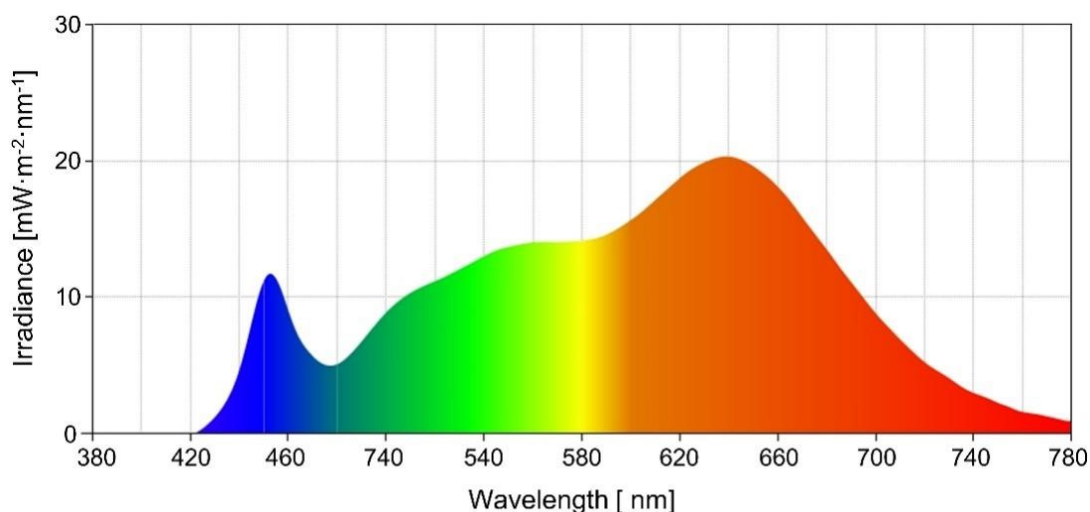

**Figure S3.** Spectrum of the warm white  $\sim 3270$  K LED used at 1000 lux ( $372 \mu\text{W}\cdot\text{cm}^{-2}$ ).

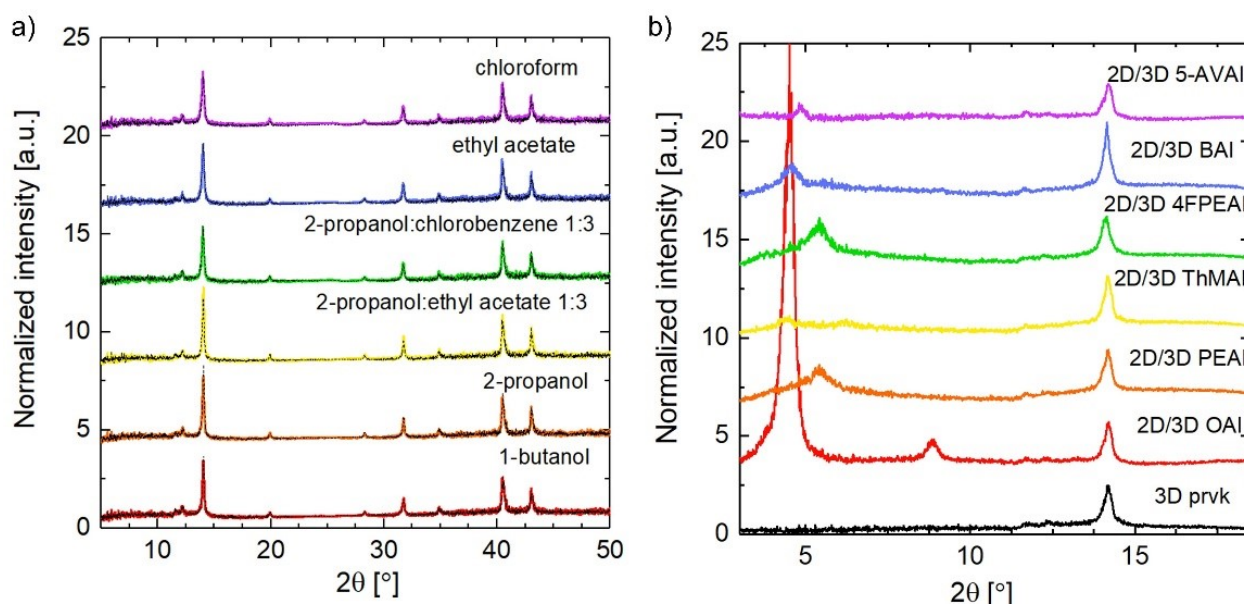

**Figure S4.** XRD data of a) 3D perovskite before and after blade coating different solvents, and b) after blade coating 10 mM of 6 different spacer cations on 3D perovskite, followed by annealing at  $85^\circ\text{C}$  for 5 min.

**Table S1.** Most relevant properties of the solvents used in the slot-die coating depositions.<sup>1</sup>

| Solvents           | Abr.             | Boiling point at 1 atm [°C] | Viscosity at 20-25°C [cP] | Dielectric Constant | Toxicity         |
|--------------------|------------------|-----------------------------|---------------------------|---------------------|------------------|
| acetonitrile       | ACN              | 81                          | 0.38                      | 38.8                | Problematic      |
| 2-methoxyethanol   | 2-ME             | 124                         | 1.72                      | 16.9                | Hazardous        |
| dimethyl sulfoxide | DMSO             | 189                         | 1.99                      | 47.2                | Problematic      |
| water              | H <sub>2</sub> O | 100                         | 1.00                      | 80.1                | Recommended      |
| chloroform         | CF               | 61                          | 0.57                      | 4.81                | Highly hazardous |
| ethyl Acetate      | EA               | 77                          | 0.43                      | 6.4                 | Recommended      |
| chlorobenzene      | CBZ              | 132                         | 0.80                      | 5.6                 | Hazardous        |
| 1-butanol          | BuOH             | 118                         | 2.98                      | 7.8                 | Recommended      |
| 2-propanol         | IPA              | 83                          | 2.40                      | 19.9                | Recommended      |

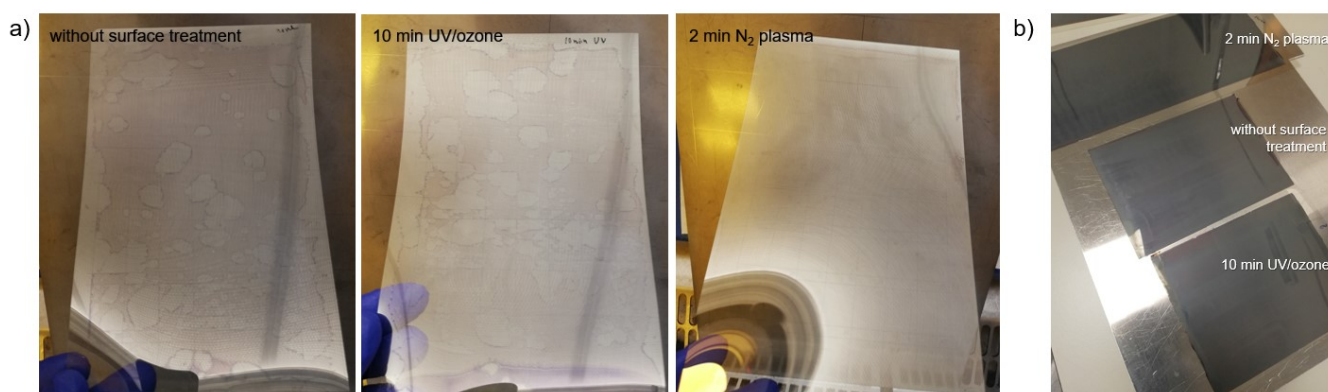

**Figure S5.** Pictures of the a) SnO<sub>2</sub> and b) perovskite films coated on PET/ ITO and SnO<sub>2</sub> (respectively), after different surface treatments.

**Table S2.** Contact angle at different times of water, diiodomethane, SnO<sub>2</sub> solvents and perovskite solvents on PET/ITO and SnO<sub>2</sub> films with different surface treatments.

| Contact angle [°]         |                  |               |             |              |             |
|---------------------------|------------------|---------------|-------------|--------------|-------------|
| solvent                   | surface          | pre-treatment | after 0.5s  | after 2s     | after 4s    |
| water                     | PET              | none          | <b>62</b>   | missing data |             |
|                           |                  | UV/ozone      | <b>50.9</b> | 50.6         | 49.8        |
|                           |                  | plasma        | <b>31.1</b> | 29.8         | 28.7        |
| diiodomethane             | PET              | none          | <b>51.4</b> | 50.9         | 50.1        |
|                           |                  | UV/ozone      | <b>50.6</b> | 50.3         | 50.1        |
|                           |                  | plasma        | <b>32.2</b> | 31.7         | 31.2        |
| SnO <sub>2</sub> solvents | PET              | none          | 33.7        | 32.9         | <b>32.5</b> |
|                           |                  | UV/ozone      | 30.8        | 29.6         | <b>28.4</b> |
|                           |                  | plasma        | 17.4        | 15.1         | <b>14</b>   |
| water                     | SnO <sub>2</sub> | none          | <b>37.3</b> | 36.7         | 36.1        |
|                           |                  | UV/ozone      | <b>15.5</b> | 13           | 10          |
|                           |                  | plasma        | <b>7.8</b>  | 3.7          | -           |
| diiodomethane             | SnO <sub>2</sub> | none          | <b>37.4</b> | 36.7         | 36.5        |
|                           |                  | UV/ozone      | <b>38.1</b> | 37.6         | 37.7        |
|                           |                  | plasma        | <b>31.5</b> | 31.2         | 31.4        |
| perovskite solvents       | SnO <sub>2</sub> | none          | <b>10.8</b> | 5            | -           |
|                           |                  | UV/ozone      | <b>12.9</b> | 11.0         | 10.3        |
|                           |                  | plasma        | <b>6.7</b>  | 3.7          | -           |
| OAI solution              | 3D prvk          | none          | 6.9         | <3           | -           |

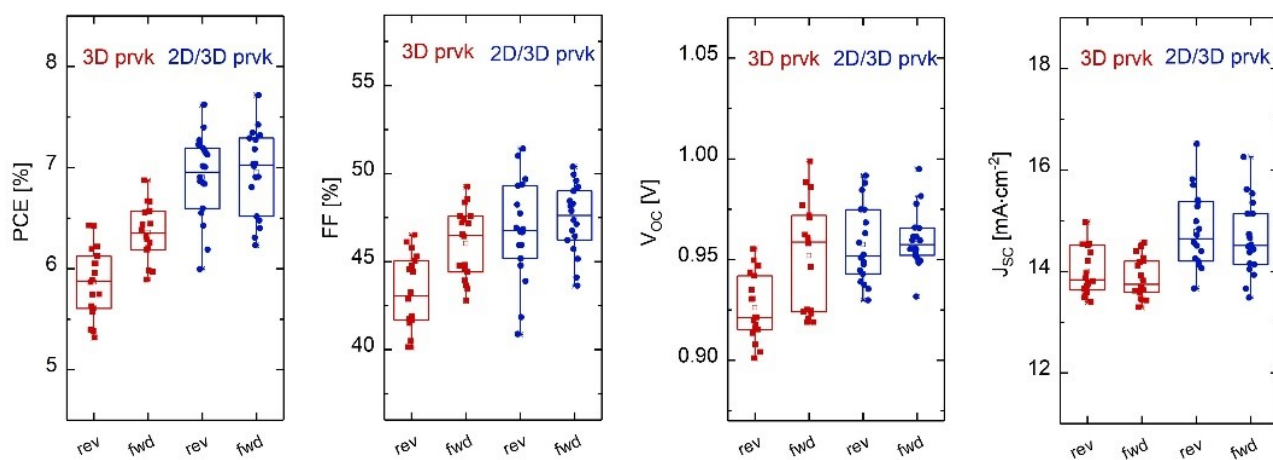

**Figure S6.** Box charts of the photovoltaic parameters of samples with and without 2D perovskite layer (18 samples each) under 1 sun.

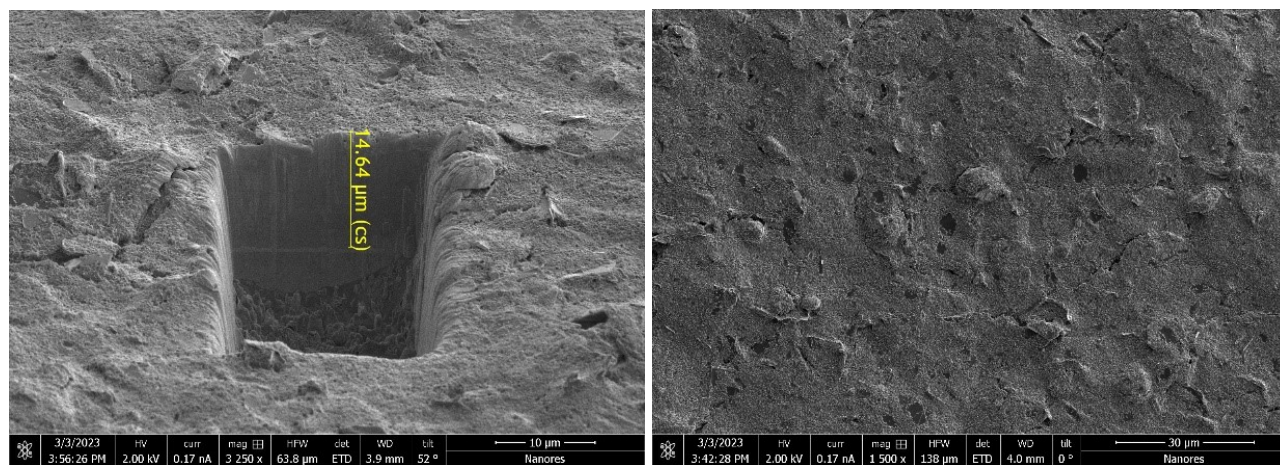

**Figure S7.** SEM cross section and top view images of a PSC with carbon electrode.

## References

- [1] D. Di Girolamo, J. Pascual, M. H. Aldamasy, Z. Iqbal, G. Li, E. Radicchi, M. Li, S.-H. Turren-Cruz, G. Nasti, A. Dallmann, F. De Angelis, A. Abate, ACS Energy Letters 2021, 6, 959.
